# Supplementary material for: Association Between Exposure to Per- and Polyfluoroalkyl Substances and Birth Outcomes: A Systematic Review and Meta-Analysis
Source: Front Public Health. 2022 Mar 24;10:855348. doi: 10.3389/fpubh.2022.855348 (PMC8988915; doi:10.3389/fpubh.2022.855348)
Supplement: Supplementary file 9 [file Table_9.xlsx]

## Sheet: PFOA
		Orginal effect estimates						Standardized effect estimates
		Continuous exposure			Categorical exposure			Continuous exposure			Categorical exposure
Study	Increment (ng/ml)	Regression Coefficients	LowerCI	UpperCI	Regression Coefficients	LowerCI	UpperCI	Regression Coefficients	LowerCI	UpperCI	Regression Coefficients	LowerCI	UpperCI
2	or				2.44	0.27	22.25				2.44	0.27	22.25
10	or e	0.53	0.18	1.55				0.53	0.18	1.55
13	or 100ng	0.96	0.79	1.16	0.8	0.4	1.4	0.999592	0.997646	1.00149	0.8	0.4	1.4	100
16	or 2	0.94	0.75	1.17	0.92	0.44	1.95	0.919342	0.67638	1.23787	0.92	0.44	1.95	2
31	or 2	0.9	0.63	1.29				0.866581	0.533673	1.41354				2
38	or 2	1	0.7	1.5	1.5	0.7	3.3	1	0.615838	1.73513	1.5	0.7	3.3	2
								0.999592	0.997646	1.00149	0.997771	0.990879	1.00337
								0.919342	0.67638	1.23787	0.892858	0.327644	2.47855
								0.866581	0.533673	1.41354	#NUM!	#NUM!	#NUM!
								1	0.615838	1.73513	1.73513	0.615838	5.0668

## Sheet: PFOS
		Orginal effect estimates						Standardized effect estimates
		Continuous exposure			Categorical exposure			Continuous exposure			Categorical exposure
Study	Increment (ng/ml)	Regression Coefficients	LowerCI	UpperCI	Regression Coefficients	LowerCI	UpperCI	Regression Coefficients	LowerCI	UpperCI	Regression Coefficients	LowerCI	UpperCI
2	or				4.82	0.56	41.16				4.82	0.56	41.16
10	or e	2.61	0.85	8.03				2.61	0.85	8.03
16	or 2	1.12	0.75	1.67	1.33	0.6	2.96	1.16653	0.67638	2.00772	1.33	0.6	2.96	2
31	or 2	1.06	0.97	1.58				1.08242	0.959447	1.8621				2
38	or 2	1.3	0.9	2	1.2	0.6	2.4	1.42845	0.866581	2.56532	1.2	0.6	2.4	2
								1.16653	0.67638	2.00772	1.47344	0.499432	4.37071
								1.08242	0.959447	1.8621	#NUM!	#NUM!	#NUM!
								1.42845	0.866581	2.56532	1.2812	0.499432	3.2867

## Sheet: PFHxS
		Orginal effect estimates						Standardized effect estimates
		Continuous exposure			Categorical exposure			Continuous exposure			Categorical exposure
Study	Increment (ng/ml)	Regression Coefficients	LowerCI	UpperCI	Regression Coefficients	LowerCI	UpperCI	Regression Coefficients	LowerCI	UpperCI	Regression Coefficients	LowerCI	UpperCI
31	or 2	0.94	0.71	1.23				0.919342	0.627826	1.32493				2
38	or 2	1.2	0.8	1.7	0.8	0.4	1.9	1.2812	0.73839	2.0569	0.8	0.4	1.9	2
								0.919342	0.627826	1.32493	#NUM!	#NUM!	#NUM!
								1.2812	0.73839	2.0569	0.73839	0.287835	2.39257

## Sheet: PFNA
		Orginal effect estimates						Standardized effect estimates
		Continuous exposure			Categorical exposure			Continuous exposure			Categorical exposure
Study	Increment (ng/ml)	Regression Coefficients	LowerCI	UpperCI	Regression Coefficients	LowerCI	UpperCI	Regression Coefficients	LowerCI	UpperCI	Regression Coefficients	LowerCI	UpperCI
10	or e	0.76	0.47	1.23				0.76	0.47	1.23
31	or 2	0.86	0.63	1.17				0.814656	0.533673	1.23787				2
38	or 2	1.5	0.9	2.4	1.5	0.6	3.6	1.73513	0.866581	3.2867	1.5	0.6	3.6	2
								0.814656	0.533673	1.23787	#NUM!	#NUM!	#NUM!
								1.73513	0.866581	3.2867	1.73513	0.499432	5.70287

## Sheet: PFUnDA
		Orginal effect estimates						Standardized effect estimates
		Continuous exposure			Categorical exposure			Continuous exposure			Categorical exposure
Study	Increment (ng/ml)	Regression Coefficients	LowerCI	UpperCI	Regression Coefficients	LowerCI	UpperCI	Regression Coefficients	LowerCI	UpperCI	Regression Coefficients	LowerCI	UpperCI
10	or e	1.01	0.53	1.91				1.01	0.53	1.91

## Sheet: PFHpS
		Orginal effect estimates						Standardized effect estimates
		Continuous exposure			Categorical exposure			Continuous exposure			Categorical exposure
Study	Increment (ng/ml)	Regression Coefficients	LowerCI	UpperCI	Regression Coefficients	LowerCI	UpperCI	Regression Coefficients	LowerCI	UpperCI	Regression Coefficients	LowerCI	UpperCI
38	or 2	1	0.6	1.5	0.5	0.2	1.4	1	0.499432	1.73513	0.389814	0.112202	1.57982	2
								1	0.499432	1.73513	0.389814	0.112202	1.57982

## Sheet: PFDA
		Orginal effect estimates						Standardized effect estimates
		Continuous exposure			Categorical exposure			Continuous exposure			Categorical exposure
Study	Increment (ng/ml)	Regression Coefficients	LowerCI	UpperCI	Regression Coefficients	LowerCI	UpperCI	Regression Coefficients	LowerCI	UpperCI	Regression Coefficients	LowerCI	UpperCI
38	or 2	1.2	0.8	1.9	0.9	0.4	2	1.2812	0.73839	2.39257	0.9	0.4	2	2
								1.2812	0.73839	2.39257	0.866581	0.287835	2.56532
